# Supplementary material for: Multiplexed profiling of GPCR activities by combining split TEV assays and EXT-based barcoded readouts
Source: PubMed Central journal article supplement (PMC5970223; doi:10.1038/s41598-018-26401-9), 2018-05-25
Supplement: 41598_2018_26401_MOESM1_ESM.pdf [file 41598_2018_26401_MOESM1_ESM.pdf]

## Supplementary Information

### Multiplexed profiling of GPCR activities by combining split TEV assays and EXT-based barcoded readouts

Sabrina Galinski<sup>1</sup>, Sven P. Wichert<sup>1,2</sup>, Moritz J. Rossner<sup>1\*</sup>, Michael C. Wehr<sup>1\*</sup>

<sup>1</sup> Molecular Neurobiology, Department of Psychiatry, Ludwig Maximilian University of Munich, Germany, Nussbaumstr. 7, 80336 Munich

<sup>2</sup> Systasy Bioscience GmbH, Adams-Lehmann-Str. 56, 80797 Munich

\* Corresponding authors:

[Moritz.Rossner@med.uni-muenchen.de](mailto:Moritz.Rossner@med.uni-muenchen.de); phone: +49 (0)89 4400 55891

[Michael.Wehr@med.uni-muenchen.de](mailto:Michael.Wehr@med.uni-muenchen.de); phone: +49 (0)89 4400 53275

|                                       |           |
|---------------------------------------|-----------|
| <b>Supplementary Figures .....</b>    | <b>3</b>  |
| <b>Supplementary Tables .....</b>     | <b>10</b> |
| <b>Supplementary Methods .....</b>    | <b>16</b> |
| <b>Supplementary References .....</b> | <b>17</b> |

## Supplementary Figures

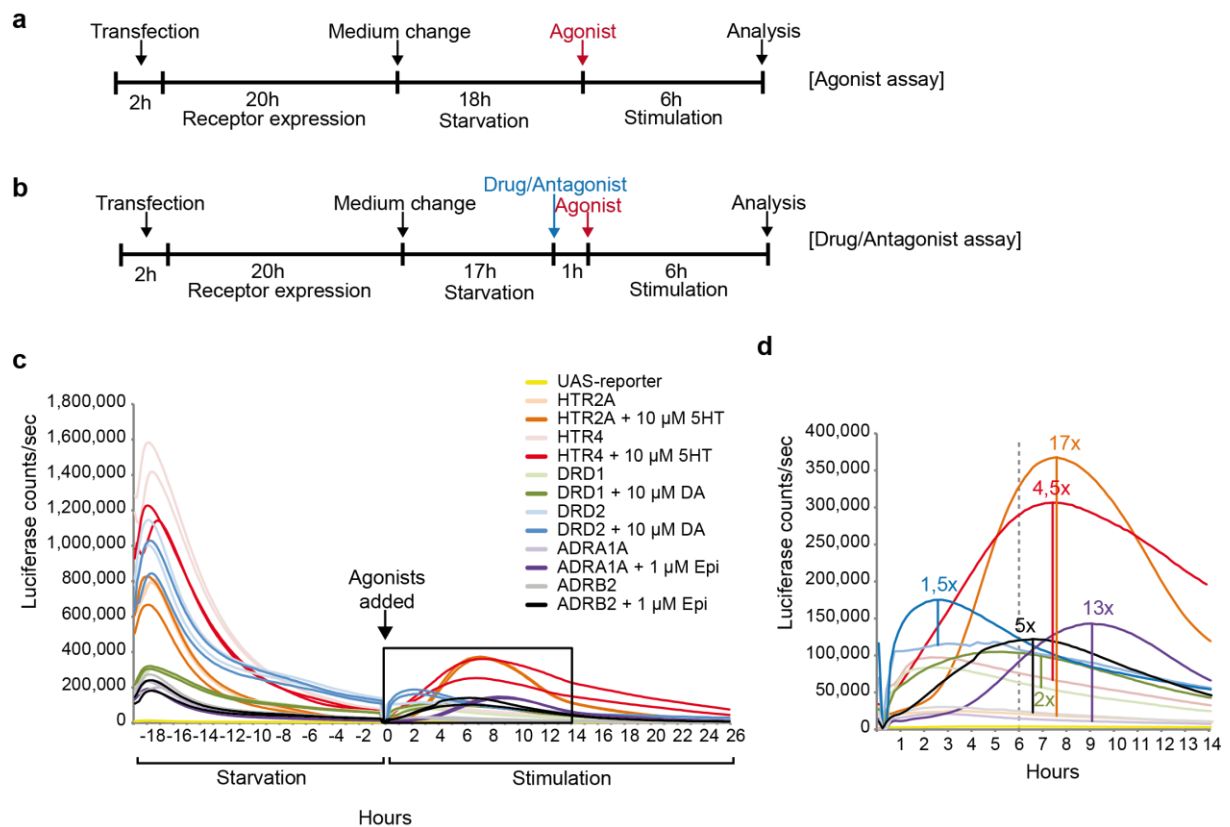

### Supplementary Figure S1. Workflow and online monitoring of GPCR split TEV assays.

In all assay types cells were transiently transfected for 2h followed by an expression phase of 20h. Afterwards, the medium was changed by serum reduced assay medium for reducing basal cell activity (starvation period). **(a)** In agonist assays, an agonist was added and incubated for 6h before lysis. **(b)** In drug/antagonist assays, cells were pre-incubated with a drug/antagonist for 1h before adding the corresponding agonist for additional 6h followed by lysis. **(c)** For kinetic assays, agonists were added to cells, and cells were incubated in a lumicycler device (lumiCycle 32 from ActiMetrics) to monitor the luciferase activity over time. Receptor activation kinetics was measured for HTR2A, HTR4, DRD1, DRD2, ADRA1A and ADRB2. PC12 cells were transfected with 'GPCR'-V2R-NTEV-tevS-GV and  $\beta$ -arrestin2delta-CTEV plasmids and the luciferase activity measured constantly during starvation phase (18h) and after application of agonists at indicated concentrations (stimulation phase, 26h). Decreasing signals during starvation phase reflect the reduction of cell activity. Luciferase readings of stimulation phase are highlighted in the box shown in **(d)**. **(d)** Stimulation phase reads for each GPCR. Means of two replicates of unstimulated and stimulated samples are displayed; dotted line indicates reads at 6h post stimulation. Fold changes show peak levels for each GPCR. Agonists: 5HT, serotonin; DA, dopamine; Epi, epinephrine.

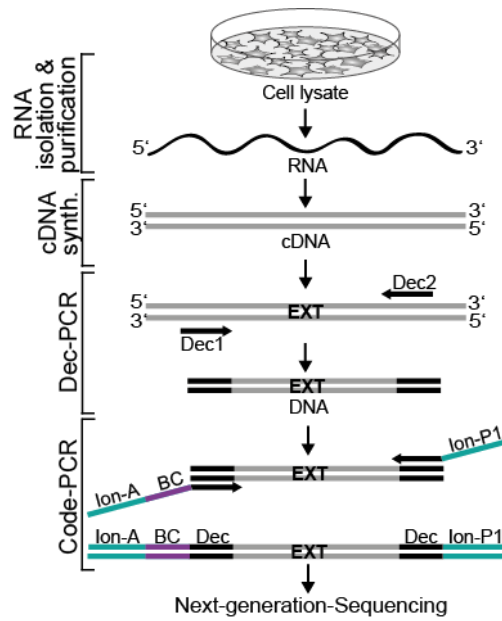

**Supplementary Figure S2. Workflow of EXT sequencing library preparation.**

Total RNA was isolated and purified from cell lysates and converted into cDNA by reverse transcription. EXT sequences were amplified by a decoding PCR (Dec-PCR) using Dec1 and Dec2 primer. Ion-A adapters together with unique 13mer barcodes (BC) and Ion-P1 adapters were added by Code-PCR.

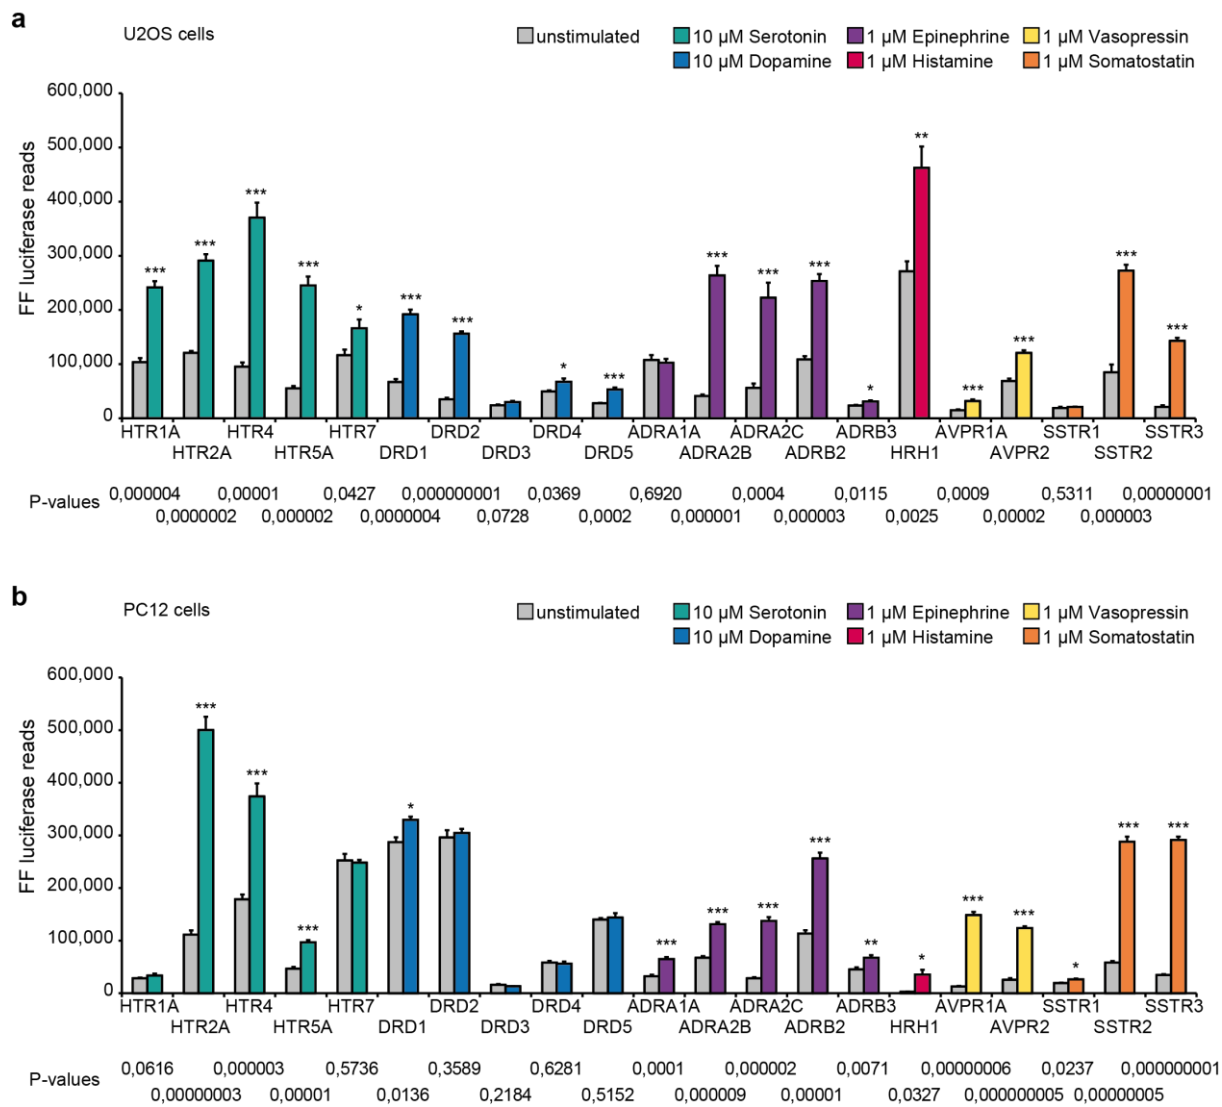

**Supplementary Figure S3. Validation of single split TEV-based GPCR split TEV assays.**

Single GPCR split TEV assays were performed as luciferase assays both in (a) U2OS and (b) PC12 cells. DRD3 did not show any significant activation and was not included into any further multiplexed GPCR assay. Grey bars indicate baseline activity levels, coloured bars indicate ligand-induced activity levels after 6h of stimulation. Colours define the subclasses of the GPCRs, with green for serotonin receptors, blue for dopamine receptors, violet for adrenergic receptors, red for histamine receptors, yellow for vasopressin receptors, and orange for somatostatin receptors. Data are shown as means  $\pm$  s.e.m. (error bars), n=6. \* $p \leq 0.05$ ; \*\* $p \leq 0.01$ ; \*\*\* $p \leq 0.001$  (two-sided t-test).

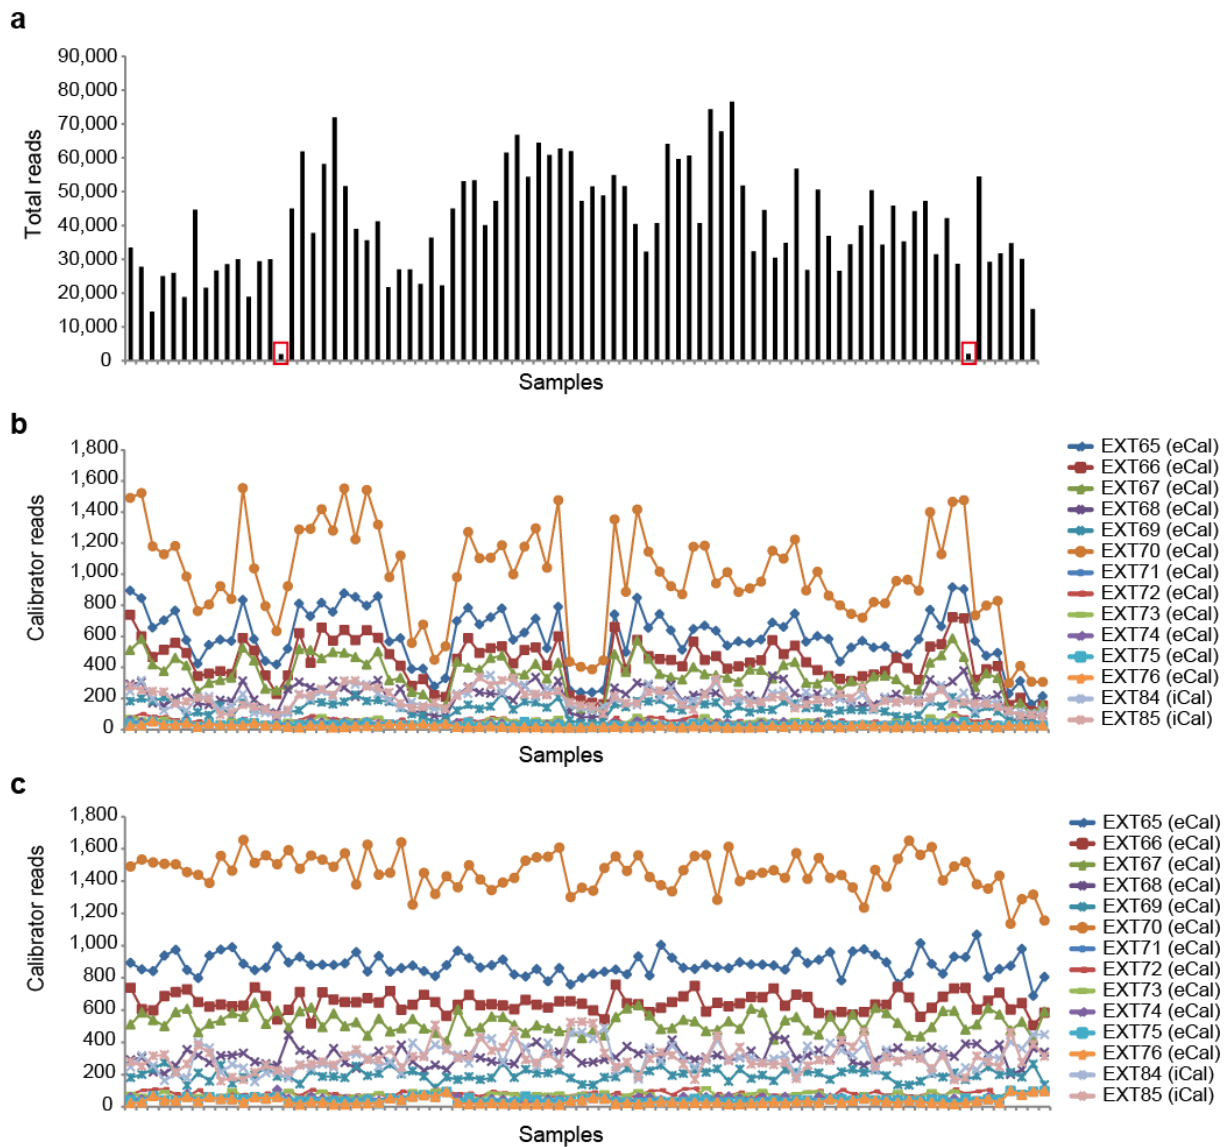

**Supplementary Figure S4. Processing of sequencing data.**

(a) Total reads per sample of raw sequencing data. Samples with a total read value below the threshold were excluded from further analysis (samples are marked by red boxes). Bottom, total reads per sample after normalization. (b) Reads of external (eCal) and internal (iCal) calibrator EXTs after normalization to total reads. Normalization factor was calculated from the highest mean of samples. (c) Calibrator EXT reads after application of normalization factor.

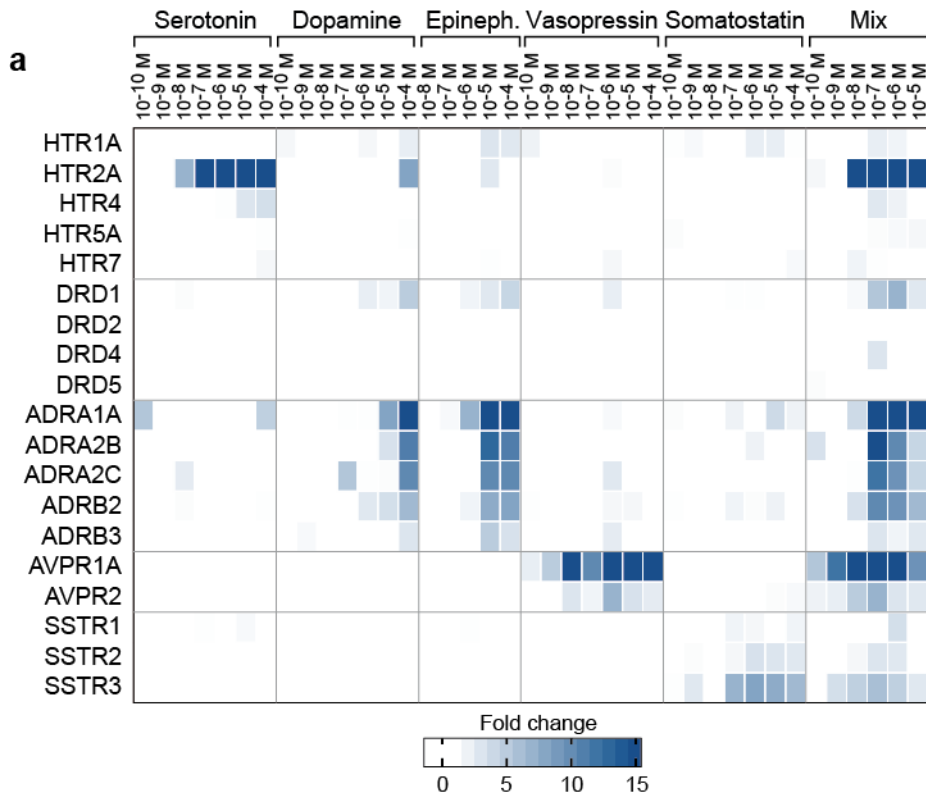

**b**

|        | 5-HT |      | DA   |      | Epi  |       | AVP  |      | SST  |      | Mix  |       |
|--------|------|------|------|------|------|-------|------|------|------|------|------|-------|
|        | U2OS | PC12 | U2OS | PC12 | U2OS | PC12  | U2OS | PC12 | U2OS | PC12 | U2OS | PC12  |
| HTR1A  |      |      |      | 2,2  |      | 3,0   |      | 2,0  |      | 2,2  |      | 2,2   |
| HTR2A  | 3,9  | 89,5 |      | 8,2  |      | 2,7   |      |      |      |      | 4,2  | 273,4 |
| HTR4   | 4,9  | 3,6  |      |      |      |       |      |      |      |      | 3,6  | 2,7   |
| HTR5A  | 3,1  |      | 2,7  |      |      |       |      |      |      |      | 4,2  |       |
| HTR7   | 2,0  |      |      |      |      |       |      |      |      |      |      |       |
| DRD1   |      |      |      | 5,1  | 2,0  | 4,3   |      | 2,2  |      |      |      | 7,0   |
| DRD2   | 3,6  |      | 5,1  |      | 5,0  |       |      |      |      |      | 3,6  |       |
| DRD4   |      |      | 5,0  |      | 3,2  |       |      |      |      |      | 2,8  | 3,0   |
| DRD5   |      |      | 2,2  |      | 2,5  |       |      |      |      |      |      |       |
| ADRA1A |      | 5,5  |      | 83,4 | 2,5  | 314,2 |      |      | 3,9  |      |      | 361,0 |
| ADRA2B |      |      | 5,6  | 11,1 | 9,2  | 12,9  |      |      | 2,0  |      | 6,3  | 16,1  |
| ADRA2C |      | 2,5  | 11,2 | 10,3 | 13,5 | 10,3  |      | 2,7  |      |      | 11,3 | 12,0  |
| ADRB2  |      |      |      | 6,5  | 2,7  | 8,2   |      |      |      | 2,0  | 2,2  | 10,3  |
| ADRB3  |      |      |      | 3,0  |      | 5,1   |      | 2,5  |      |      |      | 3,0   |
| AVPR1A |      |      |      |      |      |       | 3,1  | 44,3 |      |      | 2,8  | 47,5  |
| AVPR2  |      |      |      |      |      |       |      | 7,0  |      |      |      | 7,0   |
| SSTR1  |      |      |      |      |      |       |      |      | 2,7  |      | 2,8  | 3,6   |
| SSTR2  |      |      |      |      |      |       | 2,8  |      | 7,5  | 3,3  | 6,9  | 3,0   |
| SSTR3  |      |      |      |      |      |       |      |      | 9,1  | 8,2  | 9,3  | 6,0   |

Fold change

|     |     |     |     |      |      |       |
|-----|-----|-----|-----|------|------|-------|
| < 2 | > 2 | > 4 | > 6 | > 10 | > 15 | > 100 |
|-----|-----|-----|-----|------|------|-------|

**Supplementary Figure S5. EXT-based GPCR profiles show cell-type dependent activities.**

(a) Heat map of multiplexed GPCR activation in PC12 cells. Plotted are fold changes of receptor activation in reference to unstimulated condition of 19 different GPCRs. GPCRs were stimulated with the single compounds serotonin, dopamine, epinephrine, vasopressin and somatostatin and a mixture (Mix) of the five compounds. To visualize lower effects the colour scale is limited to 15-fold changes. (b) Summary of GPCR activations measured in U2OS and PC12 cells. Shown are the highest fold changes of each GPCR agonist interaction obtained in multiplexed profiling assays.



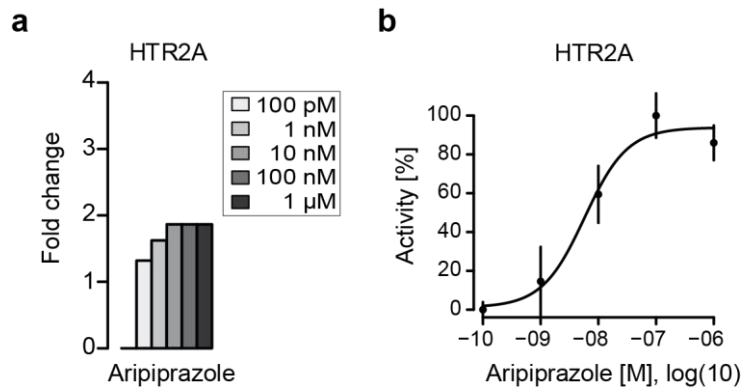

**Supplementary Figure S6. Dose-dependent activation of HTR2A by aripiprazole.**

Aripiprazole shows concentration-dependent agonistic effect on the serotonin receptor HTR2A in the multiplexed GPCRprofiler assay. **(a)** Plotted are fold changes of receptor activation in reference to unstimulated condition of the serotonin receptor HTR2A by aripiprazole. **(b)** Corresponding dose-response curve of receptor activation, data are shown as mean  $\pm$  s.e.m. (error bars),  $n=6$ .

## Supplementary Tables

### Supplementary Table S1.

Table listed all GPCRs and the assigned EXTs used in GPCRprofiler assays as denoted in the main text, the full fusion protein constructs, and the corresponding Reference Sequence (RefSeq) numbers.

| Receptor subgroup              | GPCR (denoted in text) | Full fusion protein           | RefSeq                    | EXTs assigned to experiments |                          |                       |
|--------------------------------|------------------------|-------------------------------|---------------------------|------------------------------|--------------------------|-----------------------|
|                                |                        |                               |                           | Agonist assay U2OS cells     | Agonist assay PC12 cells | Drug assay U2OS cells |
| Serotonin receptors            | HTR1A                  | HA-FLAG-HR1A-V2R-NTEV-tevS-GV | NM_000524                 | EXT01                        | EXT01                    | EXT01                 |
|                                |                        |                               |                           | EXT02                        | EXT02                    | EXT02                 |
|                                |                        |                               |                           | EXT03                        | EXT03                    | EXT03                 |
|                                | HTR2A                  | HOOK-HTR2A-V2R-NTEV-tevS-GV   | NM_000621                 | EXT04                        | EXT04                    | EXT04                 |
|                                |                        |                               |                           | EXT05                        | EXT05                    | EXT05                 |
|                                |                        |                               |                           | EXT06                        | EXT06                    | EXT06                 |
|                                | HTR4                   | HTR4-V2R-NTEV-tevS-GV         | NM_001040169              | EXT07                        | EXT07                    | EXT07                 |
|                                |                        |                               |                           | EXT08                        | EXT08                    | EXT08                 |
|                                |                        |                               |                           | EXT09                        | EXT09                    | EXT10                 |
|                                | HTR5A                  | HTR5A-V2R-NTEV-tevS-GV        | NM_024012                 | EXT10                        | EXT10                    | EXT11                 |
|                                |                        |                               |                           | EXT11                        | EXT11                    | EXT12                 |
|                                |                        |                               |                           | EXT12                        | EXT12                    | EXT13                 |
|                                | HTR7                   | HA-FLAG-HTR7-V2R-NTEV-tevS-GV | NM_000872                 | EXT13                        | EXT13                    | *                     |
|                                |                        |                               |                           | EXT14                        | EXT14                    |                       |
|                                |                        |                               |                           | EXT15                        | EXT15                    |                       |
| Dopamine receptors             | DRD1                   | DRD1-V2R-NTEV-tevS-GV         | NM_000794                 | EXT16                        | EXT16                    | EXT18                 |
|                                |                        |                               |                           | EXT17                        | EXT17                    | EXT19                 |
|                                |                        |                               |                           | EXT18                        | EXT18                    | EXT20                 |
|                                | DRD2                   | DRD2-V2R-NTEV-tevS-GV         | NM_016574 (short isoform) | EXT19                        | EXT19                    | EXT21                 |
|                                |                        |                               |                           | EXT20                        | EXT20                    | EXT80                 |
|                                |                        |                               |                           | EXT21                        | EXT21                    | EXT81                 |
|                                | DRD4                   | HA-FLAG-DRD4-V2R-NTEV-tevS-GV | NM_000797                 | EXT22                        | EXT22                    | EXT24                 |
|                                |                        |                               |                           | EXT23                        | EXT23                    | EXT25                 |
|                                |                        |                               |                           | EXT24                        | EXT24                    | EXT26                 |
|                                | DRD5                   | DRD5-V2R-NTEV-tevS-GV         | NM_000798                 | EXT25                        | EXT25                    | EXT27                 |
|                                |                        |                               |                           | EXT26                        | EXT26                    | EXT28                 |
|                                |                        |                               |                           | EXT27                        | EXT27                    | EXT29                 |
| $\alpha$ -Adrenergic receptors | ADRA1A                 | ADRA1A-V2R-NTEV-tevS-GV       | NM_033303                 | EXT28                        | EXT28                    | EXT30                 |
|                                |                        |                               |                           | EXT29                        | EXT29                    | EXT31                 |
|                                |                        |                               |                           | EXT30                        | EXT30                    | EXT32                 |
|                                | ADRA2B                 | ADRA2B-V2R-NTEV-tevS-GV       | NM_000682                 | EXT31                        | EXT31                    | EXT33                 |
|                                |                        |                               |                           | EXT32                        | EXT32                    | EXT34                 |
|                                |                        |                               |                           | EXT33                        | EXT33                    | EXT35                 |
|                                | ADRA2C                 | ADRA2C-V2R-NTEV-tevS-GV       | NM_000683                 | EXT34                        | EXT34                    | EXT36                 |
|                                |                        |                               |                           | EXT35                        | EXT35                    | EXT37                 |
|                                |                        |                               |                           | EXT36                        | EXT36                    | EXT38                 |
| $\beta$ -Adrenergic receptors  | ADRB2                  | ADRB2-V2R-NTEV-tevS-GV        | NM_000024                 | EXT37                        | EXT37                    | EXT39                 |
|                                |                        |                               |                           | EXT38                        | EXT38                    | EXT40                 |
|                                |                        |                               |                           | EXT39                        | EXT39                    | EXT41                 |
|                                | ADRB3                  | ADRB3-V2R-NTEV-tevS-GV        | NM_000025                 | EXT40                        | EXT40                    | *                     |
|                                |                        |                               |                           | EXT41                        | EXT41                    |                       |
|                                |                        |                               |                           | EXT42                        | EXT42                    |                       |

|                        |        |                         |           |       |       |       |
|------------------------|--------|-------------------------|-----------|-------|-------|-------|
| Histamine receptor     | HRH1   | HRH1-V2R-NTEV-tevS-GV   | NM_000861 | *     | *     | EXT42 |
|                        |        |                         |           |       |       | EXT43 |
|                        |        |                         |           |       |       | EXT44 |
| Vasopressin receptors  | AVPR1A | AVPR1A-V2R-NTEV-tevS-GV | NM_000706 | EXT43 | EXT43 | EXT45 |
|                        |        |                         |           | EXT44 | EXT44 | EXT46 |
|                        |        |                         |           | EXT45 | EXT45 | EXT47 |
|                        | AVPR2  | AVPR2-V2R-NTEV-tevS-GV  | NM_000054 | EXT46 | EXT46 | EXT48 |
|                        |        |                         |           | EXT47 | EXT47 | EXT49 |
|                        |        |                         |           | EXT48 | EXT48 | EXT50 |
| Somatostatin receptors | SSTR1  | SSTR1-V2R-NTEV-tevS-GV  | NM_001049 | EXT49 | EXT49 | EXT51 |
|                        |        |                         |           | EXT50 | EXT50 | EXT52 |
|                        |        |                         |           | EXT51 | EXT51 | EXT53 |
|                        | SSTR2  | SSTR2-V2R-NTEV-tevS-GV  | NM_001050 | EXT52 | EXT52 | EXT54 |
|                        |        |                         |           | EXT53 | EXT53 | EXT55 |
|                        |        |                         |           | EXT54 | EXT54 | EXT56 |
|                        | SSTR3  | SSTR3-V2R-NTEV-tevS-GV  | NM_001051 | EXT55 | EXT55 | EXT57 |
|                        |        |                         |           | EXT56 | EXT56 | EXT58 |
|                        |        |                         |           | EXT57 | EXT57 | EXT59 |

\*: GPCR not included in experiment

**Supplementary Table S2.**

Sequences of all EXT barcodes used in the assays.

| EXTs  | Sequence                                           |
|-------|----------------------------------------------------|
| EXT01 | AATCCAAATCTACTTTACATTGTGGCTCTACATCTTTATCATACTTCTA  |
| EXT02 | ACATCTTTAATCACATCAAATGTGGGACACAAATTACATCAACATACAT  |
| EXT03 | CAAATACTTTACCTTTCTTTACAGCGACTCTTTCAAATCTATACTCTTT  |
| EXT04 | ATCACTTTAATCCTTTTCTATCACGGTGTCTAACATATCATTACTCTA   |
| EXT05 | TTACTACTCTTTTACTACATTCTCGGTGTACATATCAATCAAATCACAT  |
| EXT06 | TACTCAAATACTTCTACTTTACAGGCTGACTTTTACTTCTATACTACAT  |
| EXT07 | ATCATCTACAAAACATTCTAACAGCCTGATCTATCTACAACTTTCAA    |
| EXT08 | AATCACATTTACCTTTTCTATGACGGAGTTCTAACATATCATCTACTTT  |
| EXT09 | TTACCTTTACATACATACATAGACCCTCAACATAATCCTTTTCTACAAA  |
| EXT10 | TACTATCATACTCTTTCTTTAGAGCCTGACTTTTCTATTACACATATCA  |
| EXT11 | ATCAACATTACTACATCAAAGTGGGTGTCAAACATCTTTACATACAT    |
| EXT12 | ATCACTTTAATCTTACTCTAAGAGCGTCATCTATACTATCATTACTACT  |
| EXT13 | TACTATCACAAATTACCAAATGTGCGTCTCAAACTTTACTTCTATACT   |
| EXT14 | ACATTCTACTTTTACTCTTTACAGCCACACTTTTCTAAATCAATCTCTA  |
| EXT15 | ACATTCTATTACCAAATCTATGAGCGTCATCTAACATCAAAAATCCTTT  |
| EXT16 | TCTATACTCAAACATACATTCAGCCACAACATTACTATCAAATCCAAA   |
| EXT17 | ATCAACATTACTATCATCTATGTCGGTCATCTATTACTCTATCTATCTA  |
| EXT18 | ATCAATCATTACTCTACAAATCTGGCAGACAAATTACTCTACAAATCTA  |
| EXT19 | CTTTACATTCTATCTACTTTTACTGCGTGACTTTTTACAAAAATCATCA  |
| EXT20 | ACATCTTTCTTTCAAACTTTACACCGTCTCTTTAATCCTTTACATACAT  |
| EXT21 | CTTTACATTACTACATACATACACCGTGTACATATCAACATAATCACAT  |
| EXT22 | TTACATCATCTATACTACATTGTCCCTCAACATATCAATCATCTATCTA  |
| EXT23 | TACTACATATCAATCATCTATCTCGGACTTCTACAAATCTACAACTTT   |
| EXT24 | TACTTCTATACTTTACTCTATGAGCGTGTCTATACTCTTTCTTTATCA   |
| EXT25 | TTACAATCTCTCTATCTATCACGGACATCTAAATCATCATCTACTTT    |
| EXT26 | CTTTTCTAATCAATCACTTTAGTGGGTGTCTTTTCTATACTTTACTACT  |
| EXT27 | ATCATTACAATCACATACATTCAGCCTGAACATTACTATCATCTACTTT  |
| EXT28 | ACATTCTACTTTACATACATAGAGGGTGTACATATCAAATCCAAAATCA  |
| EXT29 | AATCTCTATTACACATCAAAGACGCTGACAAATCTAATCAATCAATCA   |
| EXT30 | ATCATACTTTACATCACTTTTTCTGCCTGACTTTTTACCTTTACATATCA |
| EXT31 | TACTACATCTTTTCTATCTAAGAGGGTGTCTAATCAATCACTTTATCA   |
| EXT32 | TTACCAAATACTTTACCTTTTGGAGCGACTCTTTCTTTTACATCATTAC  |
| EXT33 | TCTATCTATCTATACTCAAATCTCGGTCTCAAATTACAATCTACTTCTA  |
| EXT34 | TCTATACTTACTTCTAACATTGACCGTCTACATTACTTCTATCTATTAC  |
| EXT35 | AATCCAAATACTTTACTCTATGTCGGACTTCTATACTTACTCTTTATCA  |
| EXT36 | TCTATACTACATCTTTTCTAAGACGGTGTCTAAATCAATCACATCTTT   |
| EXT37 | ATCAACATCTTTCTTTACATACTGGGAGTACATCTTTACATATCATTAC  |
| EXT38 | TCTACAAATACTTTACTCTATGTCCCTCTTCTACAAATACTTACTTCTA  |
| EXT39 | ATCAATCACAAATCTATCTAACACCGTGTCTATTACAATCCTTTTAC    |
| EXT40 | CTTTTACTCAAATAACATACATACAGGGTCAACATCTTCTTTATCACAAA |
| EXT41 | ATCAACATAATCACATCTTTAGAGCCTGACTTTACATTACTTACTACAT  |
| EXT42 | ATCAATCATTACACATCAAATGTGCGTCTCAAACATTACTACATAATC   |
| EXT43 | AATCATCATTACACATTCTATCAGGCTGTCTAATCAATCATCTAATCA   |
| EXT44 | ATCATACTCTTTTACTCAAAGTGGCTCTCAAATCAAATCAATCACAT    |
| EXT45 | TCTATACTATCAACATCTTTAGACCGTGTCTTTTCTATACTAATCTTAC  |
| EXT46 | AATCATCATTACTCTACTTTAGACCGAGTCTTTCTTTACATTACTTTAC  |
| EXT47 | CTTTTACTATCATACTCTTTTTCAGCTTCACTTTCTTTTACTCTACAAA  |
| EXT48 | TACTTACTACATCAAACATAGACCGAGTACATTCTAAATCCTTTTACT   |
| EXT49 | ATCATCTAATCAACATACATAGTGGGAGAACATTCTAATCAAATCTCTA  |
| EXT50 | ACATTTACACATCAAACAAATGACCGTCACAAAATCAACATCTTTACAT  |
| EXT51 | TCTAATCAAATCACATTCTAACTGCGACATCTAACATATCATCTATTAC  |

|       |                                                    |
|-------|----------------------------------------------------|
| EXT52 | CTTTTCTAACATTCTATCTATGTCCAGATCTATCTACTTTTACTTTAC   |
| EXT53 | TTACTACTACATACATACATTTCAGCCTCAACATCAAAAATCCTTTCTTT |
| EXT54 | TTACATCAAATCCTTTACATACTGGGACAACATCTTTAATCCAAAATCA  |
| EXT55 | CTTTTCTACTTTTACACATTGTGGGAGAACATTACTATCAAATCATCA   |
| EXT56 | ACATACATACATTACACATTTCAGGGACAACATTCTACAAAATTACCAA  |
| EXT57 | TACTTTACCAAACCTTTCTAAGACGCTCATCTAATCACAAAATCACAT   |
| EXT58 | TACTTCTACTTTTACATCTTTAGTGGGTCTCTTTTCTATTACAATCTACT |
| EXT59 | TTACCAAACATTTACACATTGACGGGTGACATATCATCTATACTAATC   |
| EXT60 | ATCAAATCCTTTAATCACATTCTGGCTCAACATATCATTACACATCAA   |
| EXT61 | AATCATCAATCATACTCTTTTCTGGCTCTCTTTTACCAAACCTTTCTTT  |
| EXT62 | CAAAACATTACTACATTCTAAGTGGCTCTTCTAATCATACTTCTACAAA  |
| EXT63 | AATCACATTACTAATCACATACACGGTGAACATACATCAAAATCACAAA  |
| EXT64 | CTTTTACTTCTAACATCTTTAGTGCCTGACTTTTCTATACTAATCAATC  |
| EXT65 | ACATACATCAAAACATCTTTAGAGCCTGTCTTTCTTTATCAACATTACT  |
| EXT66 | ACATATCAACATTCTACTTTTGTGGGTGACTTTTACTACTTACTACAT   |
| EXT67 | ACATAATCCTTTCTTTACATACACGGAGTACATTACTACATTACTTTAC  |
| EXT68 | TACTTCTACATTGTCCCTCAACATTCTACTTTTCTACTTTTCTATAGTG  |
| EXT69 | ATCATCTAACATCAAACCTTTTGAGGCTGACTTTCTTTTACACATTAC   |
| EXT70 | ATCATCTACAAATCTAACATTCTGGCTCTACATATCAACATTACTTCTA  |
| EXT71 | CAAACCTTTTACATCACAAAACCTCGCAGACAAAACATAATCTTACCAA  |
| EXT72 | CAAATCTATACTCAAAACATAGTGGGTGAACATTACTTACTATCATCTA  |
| EXT73 | CAAAATCATTACATCAACATACACCGTGTACATTCTAACATATCACTTT  |
| EXT74 | ACATTCTAAATCACATCAAAACCTGGGTGACAAACTTTACATTTACACAT |
| EXT75 | ACATATCAACATAATCTCTATCAGCCACATCTAATCATACTAATCTCTA  |
| EXT76 | CAAATTACCAAACCTTTCTATCTGGGTGTTCTACAAACTTTCTTTTAC   |
| EXT77 | ATCATTTAACATAATCTCTATGACGGTCTTCTAATCATTACATCACAAA  |
| EXT78 | AATCTACTTACTTCTACAAATCACGGACACAAATTACTCTAATCACTTT  |
| EXT79 | TTACCTTTACATACATACATTTCAGCGTGTACATTCTACTTTCTTTAATC |
| EXT80 | AATCTCTACAAACAAATCTATCAGGCTGATCTAACATCTTTTACCTTT   |
| EXT81 | ATCAATCAAATCTCTATCTAAGACGGAGATCTAAATCATCATACTTCTA  |
| EXT82 | ACATCAAATACTTCTATCTATGAGGCTGATCTAAATCCTTTACATTACT  |
| EXT83 | TCTAACATATCATCTAACATAGAGGGTCAACATACATTCTAAATCAATC  |
| EXT84 | AATCCAAACTTTTATCAACATTTCAGGACTACATACATCAAAAATCAATC |
| EXT85 | TCTATACTTTACTACTTCTAACAGGCACATCTAATCAAATCAATCACAT  |

**Supplementary Table S3.**

Overview of the experimental conditions of the different types of assays.

|                             | <b>Luciferase assay</b> | <b>Single EXT assay</b> | <b>Multiplexed EXT assay<br/>(GPCRprofiler)</b>    | <b>Kinetic assay</b>   |
|-----------------------------|-------------------------|-------------------------|----------------------------------------------------|------------------------|
| <b>Plate format</b>         | 96-well                 | 6-well                  | 6-well                                             | 3.5 cm dish            |
| <b>Cell number per well</b> | $4 \times 10^4$ (PC12)  | $4 \times 10^5$ (PC12)  | $6 \times 10^5$ (U2OS)<br>$1.4 \times 10^6$ (PC12) | $1 \times 10^6$ (PC12) |
| <b>Transfection</b>         | on-plate                | on-plate                | in-solution                                        | on-plate               |
| <b>Lysis buffer</b>         | PLB                     | RLT                     | RLT                                                | -                      |
| <b>Lysis volume</b>         | 30 $\mu$ l              | 500 $\mu$ l             | 500 $\mu$ l                                        | -                      |

**Supplementary Table S4.**

Comparison of drug-induced effects measured by the GPCRprofiler and the public databases PubChem<sup>1</sup> and IUPHAR<sup>2,3</sup>.

| Receptor      | Paliperidone |                           |                         | Aripiprazole |                                                    |                          |
|---------------|--------------|---------------------------|-------------------------|--------------|----------------------------------------------------|--------------------------|
|               | GPCRprofiler | PubChem                   | IUPHAR                  | GPCRprofiler | PubChem                                            | IUPHAR                   |
| <b>HTR2A</b>  | Antagonist   | Antagonist <sup>4-6</sup> | Antagonist <sup>7</sup> | Agonist      | Antagonist <sup>8,9</sup>                          | Agonist <sup>10,11</sup> |
| <b>DRD2</b>   | Antagonist   | Antagonist <sup>4,5</sup> | N.A.                    | Agonist      | Antagonist/<br>partial<br>agonist <sup>12-14</sup> | Agonist <sup>15,16</sup> |
| <b>ADRA2B</b> | Antagonist   | Antagonist <sup>6</sup>   | N.A.                    | N.A.         | Antagonist <sup>17</sup>                           | N.A.                     |
| <b>ADRA2C</b> | Antagonist   | N.A.                      | N.A.                    | Antagonist   | Antagonist <sup>17</sup>                           | N.A.                     |
| <b>HRH1</b>   | Antagonist   | Agonist <sup>4-6</sup>    | Antagonist <sup>7</sup> | Antagonist   | Antagonist <sup>17</sup>                           | Antagonist <sup>10</sup> |

N.A., not available.

## Supplementary Methods

### Online luciferase reporter assays

For online GPCR split TEV assays PC12 cells were plated on 3.5 cm dishes at  $1 \times 10^6$  cells per dish. On the next day, cells were transfected with lipofectamine 2000 (Invitrogen) diluted in opti-MEM (Gibco) and incubated for 2h at 37°C, followed by exchange of transfection medium by culture medium (low glucose DMEM medium (1 g/L, Lonza), supplemented with 10% FBS, 5% HS, 2 mM GlutaMAX (Gibco) and 100 U/ml each of penicillin and streptomycin). After 24h medium was exchanged by starvation medium (low glucose DMEM (1 g/L) supplemented with 1% FBS and 0.1 mM NEAA) additionally supplemented with 0.1% luciferin (Promega). To measure the firefly luciferase activity, the dishes were transferred to a 32-channel luminometer (lumiCycle 32 by ActiMetrics), which was located inside a cell culture incubator at 37°C and 5% CO<sub>2</sub>. Cells were starved for 16h followed by compound treatment and online luciferase readings over 36h.

### Modification of GPCR signal peptides

Due to a low expression rate and functionality in split TEV assays of the serotonin receptors HTR1A, HTR2A and HTR7, and the dopamine receptor DRD4 the signal peptide for cell membrane localization was either exchanged or an additional signal peptide was added. For the serotonin receptors HTR1A and HTR7 and the dopamine receptor DRD4 a HA-Flag signal peptide (sequence: ATGGAGACAGACACACTCCTGCTATGGGTACTGCTGCTCTGGGTTCCAGGTTCCACTGGTGAC) was added by PCR N-terminal in front of the GPCR. For the modification of the serotonin receptor HTR2A by changing the signal peptide the native signal peptide sequence was determined using the program <http://www.predisi.de/>. The signal peptide was changed by the signal sequence of the mouse Ig κ-chain V-J2-C proteins (sequence: ATGGAGACAGACACACTCCTGCTATGGGTACTGCTGCTCTGGGTTCCAGGTTCCACTGGTGAC).



## Supplementary References

1. Kim, S. *et al.* PubChem Substance and Compound databases. *Nucleic Acids Res.* **44**, D1202–D1213 (2016).
2. Harding, S. D. *et al.* The IUPHAR/BPS Guide to PHARMACOLOGY in 2018: updates and expansion to encompass the new guide to IMMUNOPHARMACOLOGY. *Nucleic Acids Res.* (2017). doi:10.1093/nar/gkx1121
3. Alexander, S. P. *et al.* THE CONCISE GUIDE TO PHARMACOLOGY 2017/18: G protein-coupled receptors. *Br. J. Pharmacol.* **174**, S17–S129 (2017).
4. Cohen, L. J. Risperidone. *Pharmacotherapy* **14**, 253–265 (1994).
5. Megens, A. A. *et al.* Survey on the pharmacodynamics of the new antipsychotic risperidone. *Psychopharmacology (Berl.)* **114**, 9–23 (1994).
6. Richelson, E. & Souder, T. Binding of antipsychotic drugs to human brain receptors focus on newer generation compounds. *Life Sci.* **68**, 29–39 (2000).
7. Schotte, A. *et al.* Risperidone compared with new and reference antipsychotic drugs: in vitro and in vivo receptor binding. *Psychopharmacology (Berl.)* **124**, 57–73 (1996).
8. Bortolozzi, A., Díaz-Mataix, L., Toth, M., Celada, P. & Artigas, F. In vivo actions of aripiprazole on serotonergic and dopaminergic systems in rodent brain. *Psychopharmacology (Berl.)* **191**, 745–758 (2007).
9. Stark, A. D. *et al.* Interaction of the novel antipsychotic aripiprazole with 5-HT<sub>1A</sub> and 5-HT<sub>2A</sub> receptors: functional receptor-binding and in vivo electrophysiological studies. *Psychopharmacology (Berl.)* **190**, 373–382 (2007).
10. Kroeze, W. K. *et al.* H<sub>1</sub>-histamine receptor affinity predicts short-term weight gain for typical and atypical antipsychotic drugs. *Neuropsychopharmacol. Off. Publ. Am. Coll. Neuropsychopharmacol.* **28**, 519–526 (2003).

11. Shapiro, D. A. *et al.* Aripiprazole, a novel atypical antipsychotic drug with a unique and robust pharmacology. *Neuropsychopharmacol. Off. Publ. Am. Coll. Neuropsychopharmacol.* **28**, 1400–1411 (2003).
12. Hirose, T. & Kikuchi, T. Aripiprazole, a novel antipsychotic agent: dopamine D2 receptor partial agonist. *J. Med. Investig. JMI* **52 Suppl**, 284–290 (2005).
13. Wood, M. & Reavill, C. Aripiprazole acts as a selective dopamine D2 receptor partial agonist. *Expert Opin. Investig. Drugs* **16**, 771–775 (2007).
14. Wood, M. D. *et al.* Aripiprazole and its human metabolite are partial agonists at the human dopamine D2 receptor, but the rodent metabolite displays antagonist properties. *Eur. J. Pharmacol.* **546**, 88–94 (2006).
15. Allen, J. A. *et al.* Discovery of  $\beta$ -Arrestin-Biased Dopamine D2 Ligands for Probing Signal Transduction Pathways Essential for Antipsychotic Efficacy. *Proc. Natl. Acad. Sci. U. S. A.* **108**, 18488–18493 (2011).
16. Zajdel, P. *et al.* Antidepressant and antipsychotic activity of new quinoline- and isoquinoline-sulfonamide analogs of aripiprazole targeting serotonin 5-HT<sub>1A</sub>/5-HT<sub>2A</sub>/5-HT<sub>7</sub> and dopamine D<sub>2</sub>/D<sub>3</sub> receptors. *Eur. J. Med. Chem.* **60**, 42–50 (2013).
17. Nasrallah, H. A. Atypical antipsychotic-induced metabolic side effects: insights from receptor-binding profiles. *Mol. Psychiatry* **13**, 27–35 (2008).
